# Supplementary material for: Effective and selective iodofunctionalisation of organic molecules in water using the iodine–hydrogen peroxide tandem
Source: Royal Society of Chemistry journal article supplement (doi:10.1039/b409919b), 2004-01-01
Supplement: b409919b.pdf [file b409919b.pdf]

## Effective and selective iodofunctionalisation of organic molecules in water using the iodine-hydrogen peroxide tandem

Marjan Jereb<sup>\*a</sup>, Marko Zupan<sup>ab</sup> and Stojan Stavber<sup>b</sup>

<sup>a</sup> Department of Chemistry of the Faculty for Chemistry and Chemical Technology of the University of Ljubljana, Aškerčeva 5, 1000 Ljubljana, Slovenia. Fax +386 1 241 9220; Tel: +386 1 241 9248;

E-mail: marjan.jereb@uni-lj.si

<sup>b</sup> "Jožef Stefan" Institute, Jamova 39, 1000 Ljubljana, Slovenia.

### Electronic supplementary information†

Starting substrates were purchased from Aldrich, Fluka and Merck, solvents (ACS grade) were purchased from Fluka and Merck and used as received. A commercially available 30% aqueous solution of hydrogen peroxide was used as received. Melting points were determined on a Büchi 535 apparatus and are uncorrected. Chemical shifts both <sup>1</sup>H NMR and <sup>13</sup>C NMR are reported in ppm from TMS as internal standard. <sup>1</sup>H NMR spectra were recorded on a Varian Inova 300 spectrometer at 300 MHz and <sup>13</sup>C NMR on the same instrument at 75 MHz. IR spectra were recorded on a Perkin-Elmer 1310 spectrometer. The standard KBr pellet procedure were used to obtain IR spectra of solids, while a film of neat material was used to obtain IR spectra of liquid products. Mass spectra were obtained on an Autospec Q instrument under impact (EI) conditions at 70 eV. Elemental analysis was carried out on a Perkin-Elmer 2400 CHN analyzer.

**(±)-1-Oxo-2-iodo-2-carbethoxycyclopentane (4c)**; unstable oily compound (contains 10% of **3c**), conversion 90%, decomposed during TLC; <sup>1</sup>H NMR (300 MHz, CDCl<sub>3</sub>) δ 1.31 (3H, t, *J*=7.2 Hz), 2.10-2.18 (2H, m), 2.32-2.56 (4H, m), 4.28 (2H, dq, *J*=7.1 Hz, *J*=0.6Hz); <sup>13</sup>C NMR (75 MHz, CDCl<sub>3</sub>) δ 13.9 (CH<sub>3</sub>), 19.9 (C-4), 35.0 (C-3), 40.2 (C-5), 43.4 (C-2), 63.2 (CH<sub>2</sub>), 168.0 (COOEt), 207.0 (CO); IR (liquid film); 2979, 1736 (br), 1443, 1367, 1250, 1236, 1019 cm<sup>-1</sup>; MS (EI, 70eV) *m/z* 282 (M<sup>+</sup>, 14%), 254 (7), 237 (17), 227 (12), 209 (10), 199 (44), 181 (29), 167 (8), 155 (95), 127 (35), 109 (95), 99 (46), 85 (46), 81 (36), 55 (100); HRMS Calcd for C<sub>8</sub>H<sub>11</sub>IO<sub>3</sub>: 281.9753, found: 281.9762.

**3',5'-Dihydroxy-4'-iodoacetophenone (6c)**; white solid, mp=189.5-192.5°C (decomp), 85% from pentane/acetone; <sup>1</sup>H NMR (300 MHz, acetone-*d*<sub>6</sub>-CDCl<sub>3</sub>) δ 2.51 (3H, s), 7.06 (2H, s); <sup>13</sup>C NMR (75 MHz, acetone-*d*<sub>6</sub>-CDCl<sub>3</sub>) δ 25.4 (CH<sub>3</sub>), 92.8 (C-4), 104.8 (C-2,6), 137.9 (C-1), 157.0 (C-3,5), 195.9 (CO); IR (KBr); 3422, 1658, 1587, 1414, 1240, 1038, 849 cm<sup>-1</sup>; MS (EI, 70eV) *m/z* 278 (M<sup>+</sup>, 71%), 263 (100), 235 (29), 108 (27). Anal. Calcd for C<sub>8</sub>H<sub>7</sub>IO<sub>3</sub>: C 34.56, H 2.54. Found: C 34.40, H 2.26.
